# Supplementary material
Source: publisher site journal article supplement (https://www.dovepress.com/article/484914)
Supplement: Supplementary file 1 [file get_supplementary_file.php]

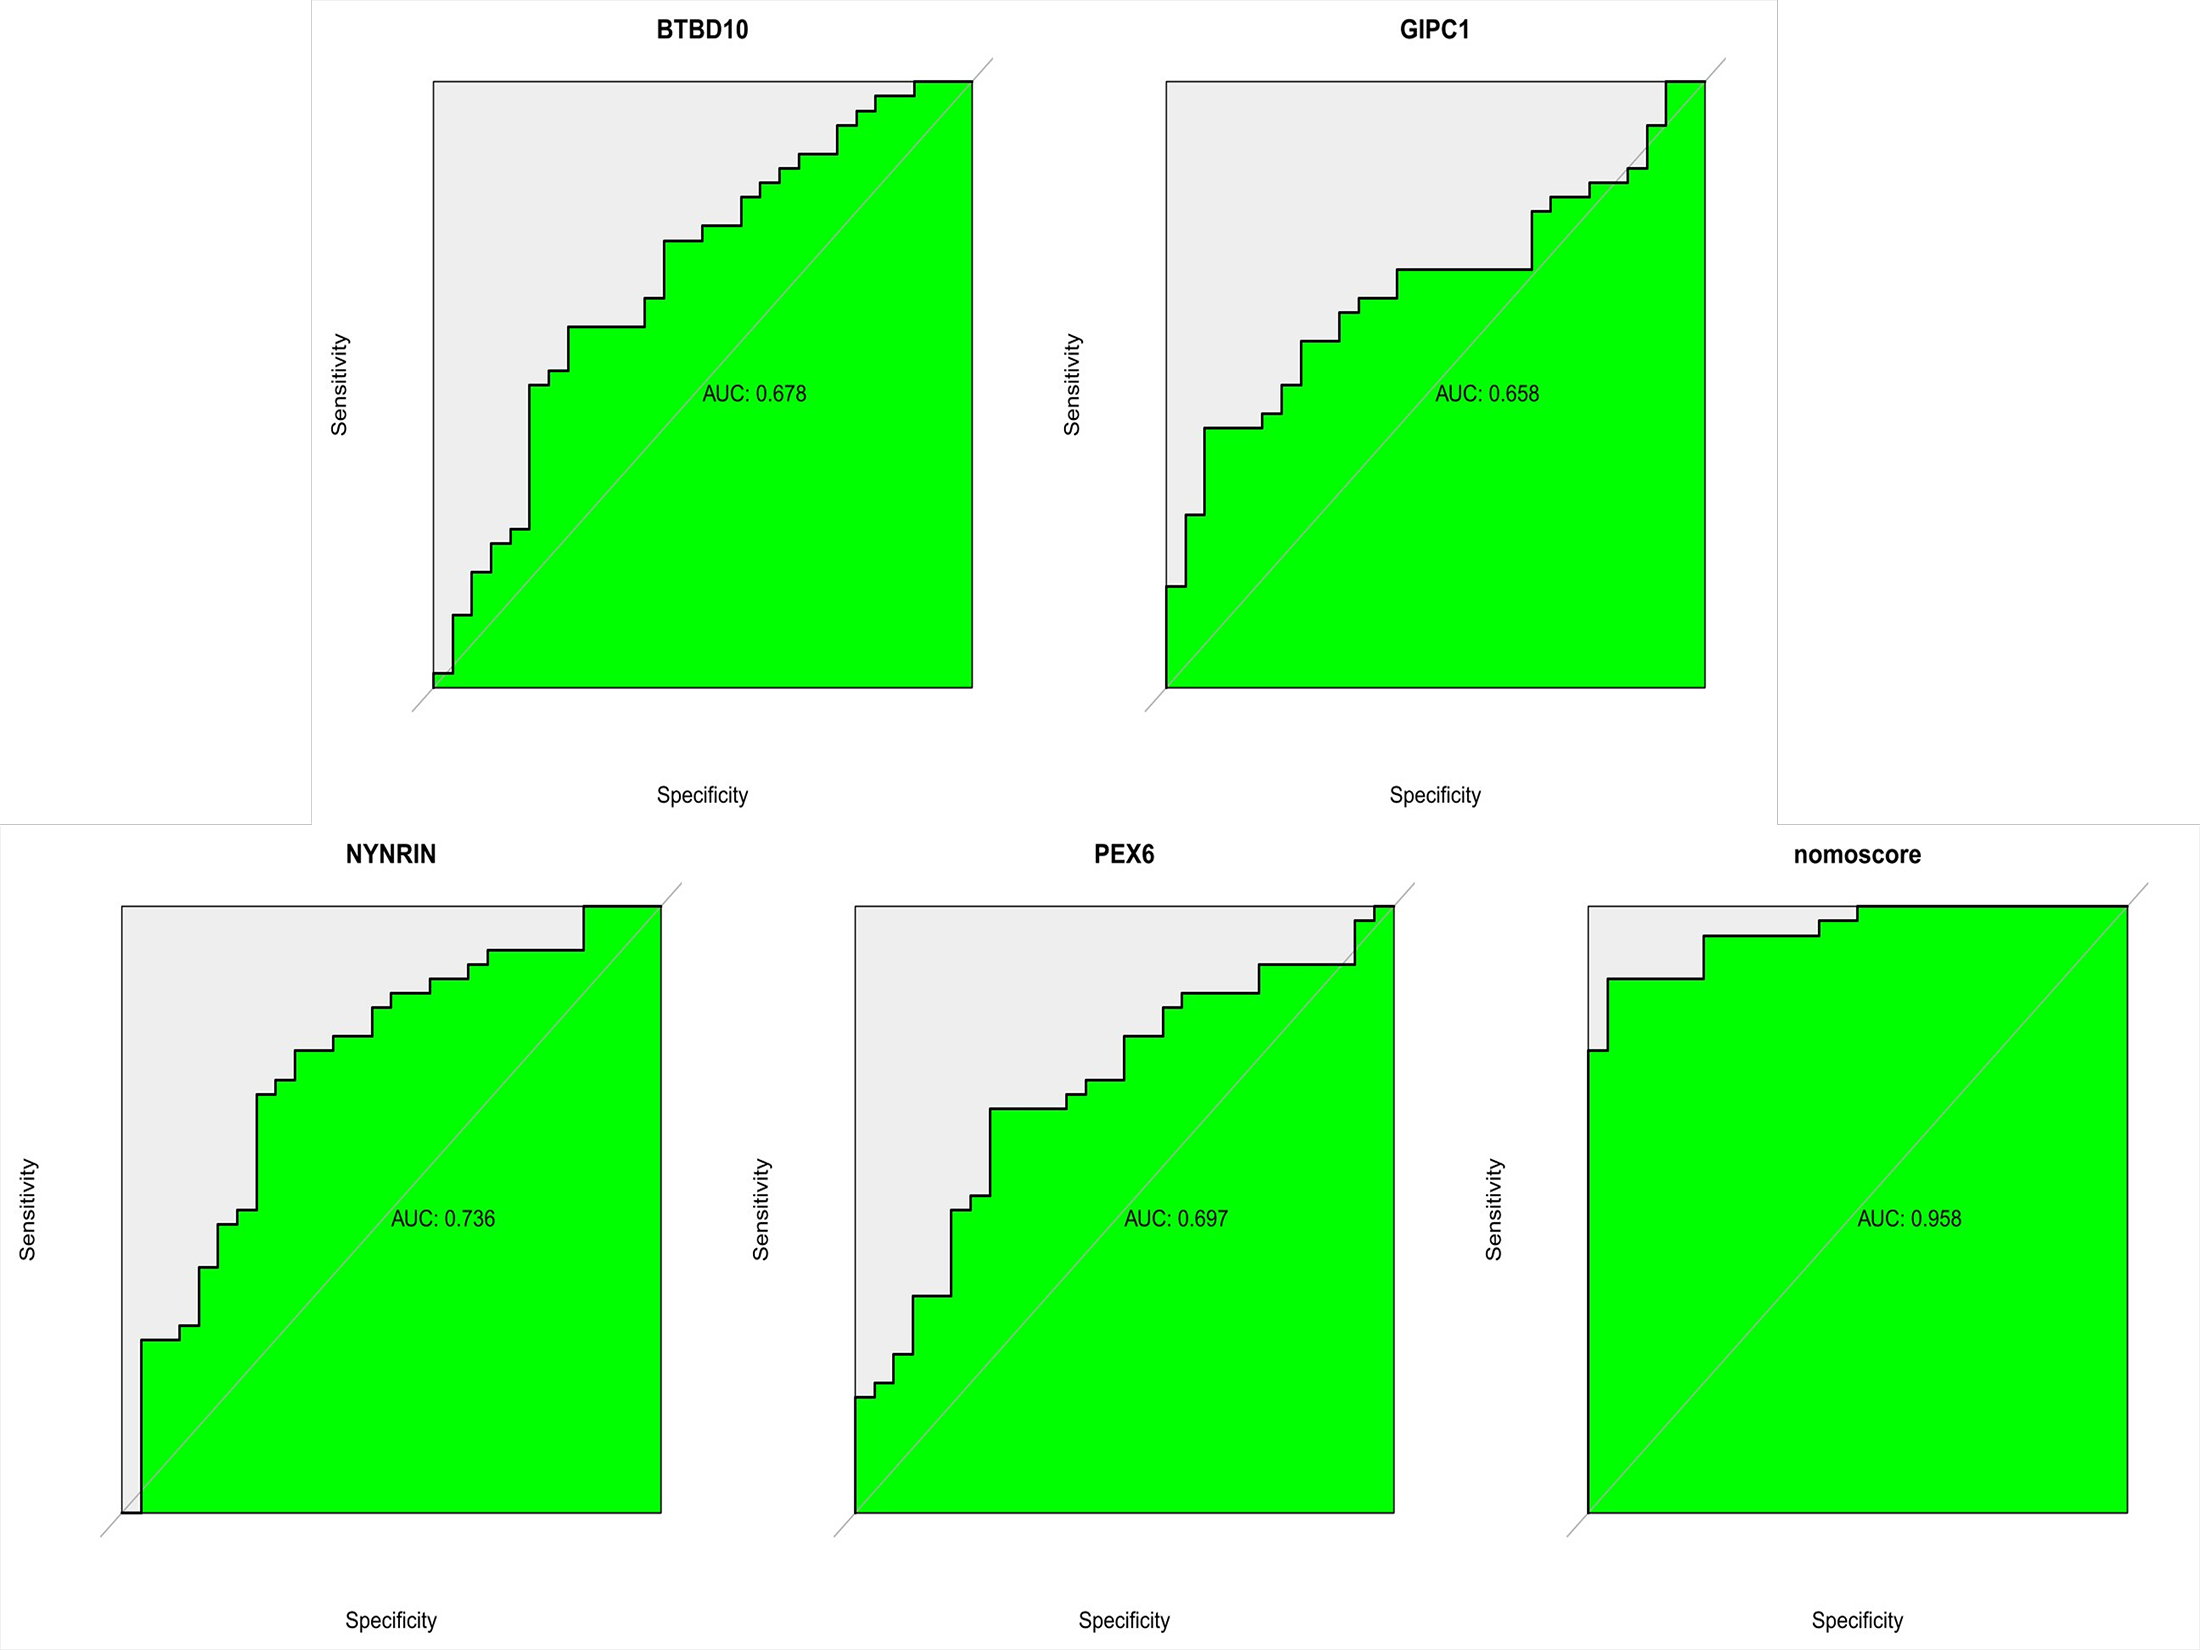


Supplementary Figure 1 Evaluation of the diagnostic efficacy of key genes and the prediction model inGSE136825; AUC : area under the curve


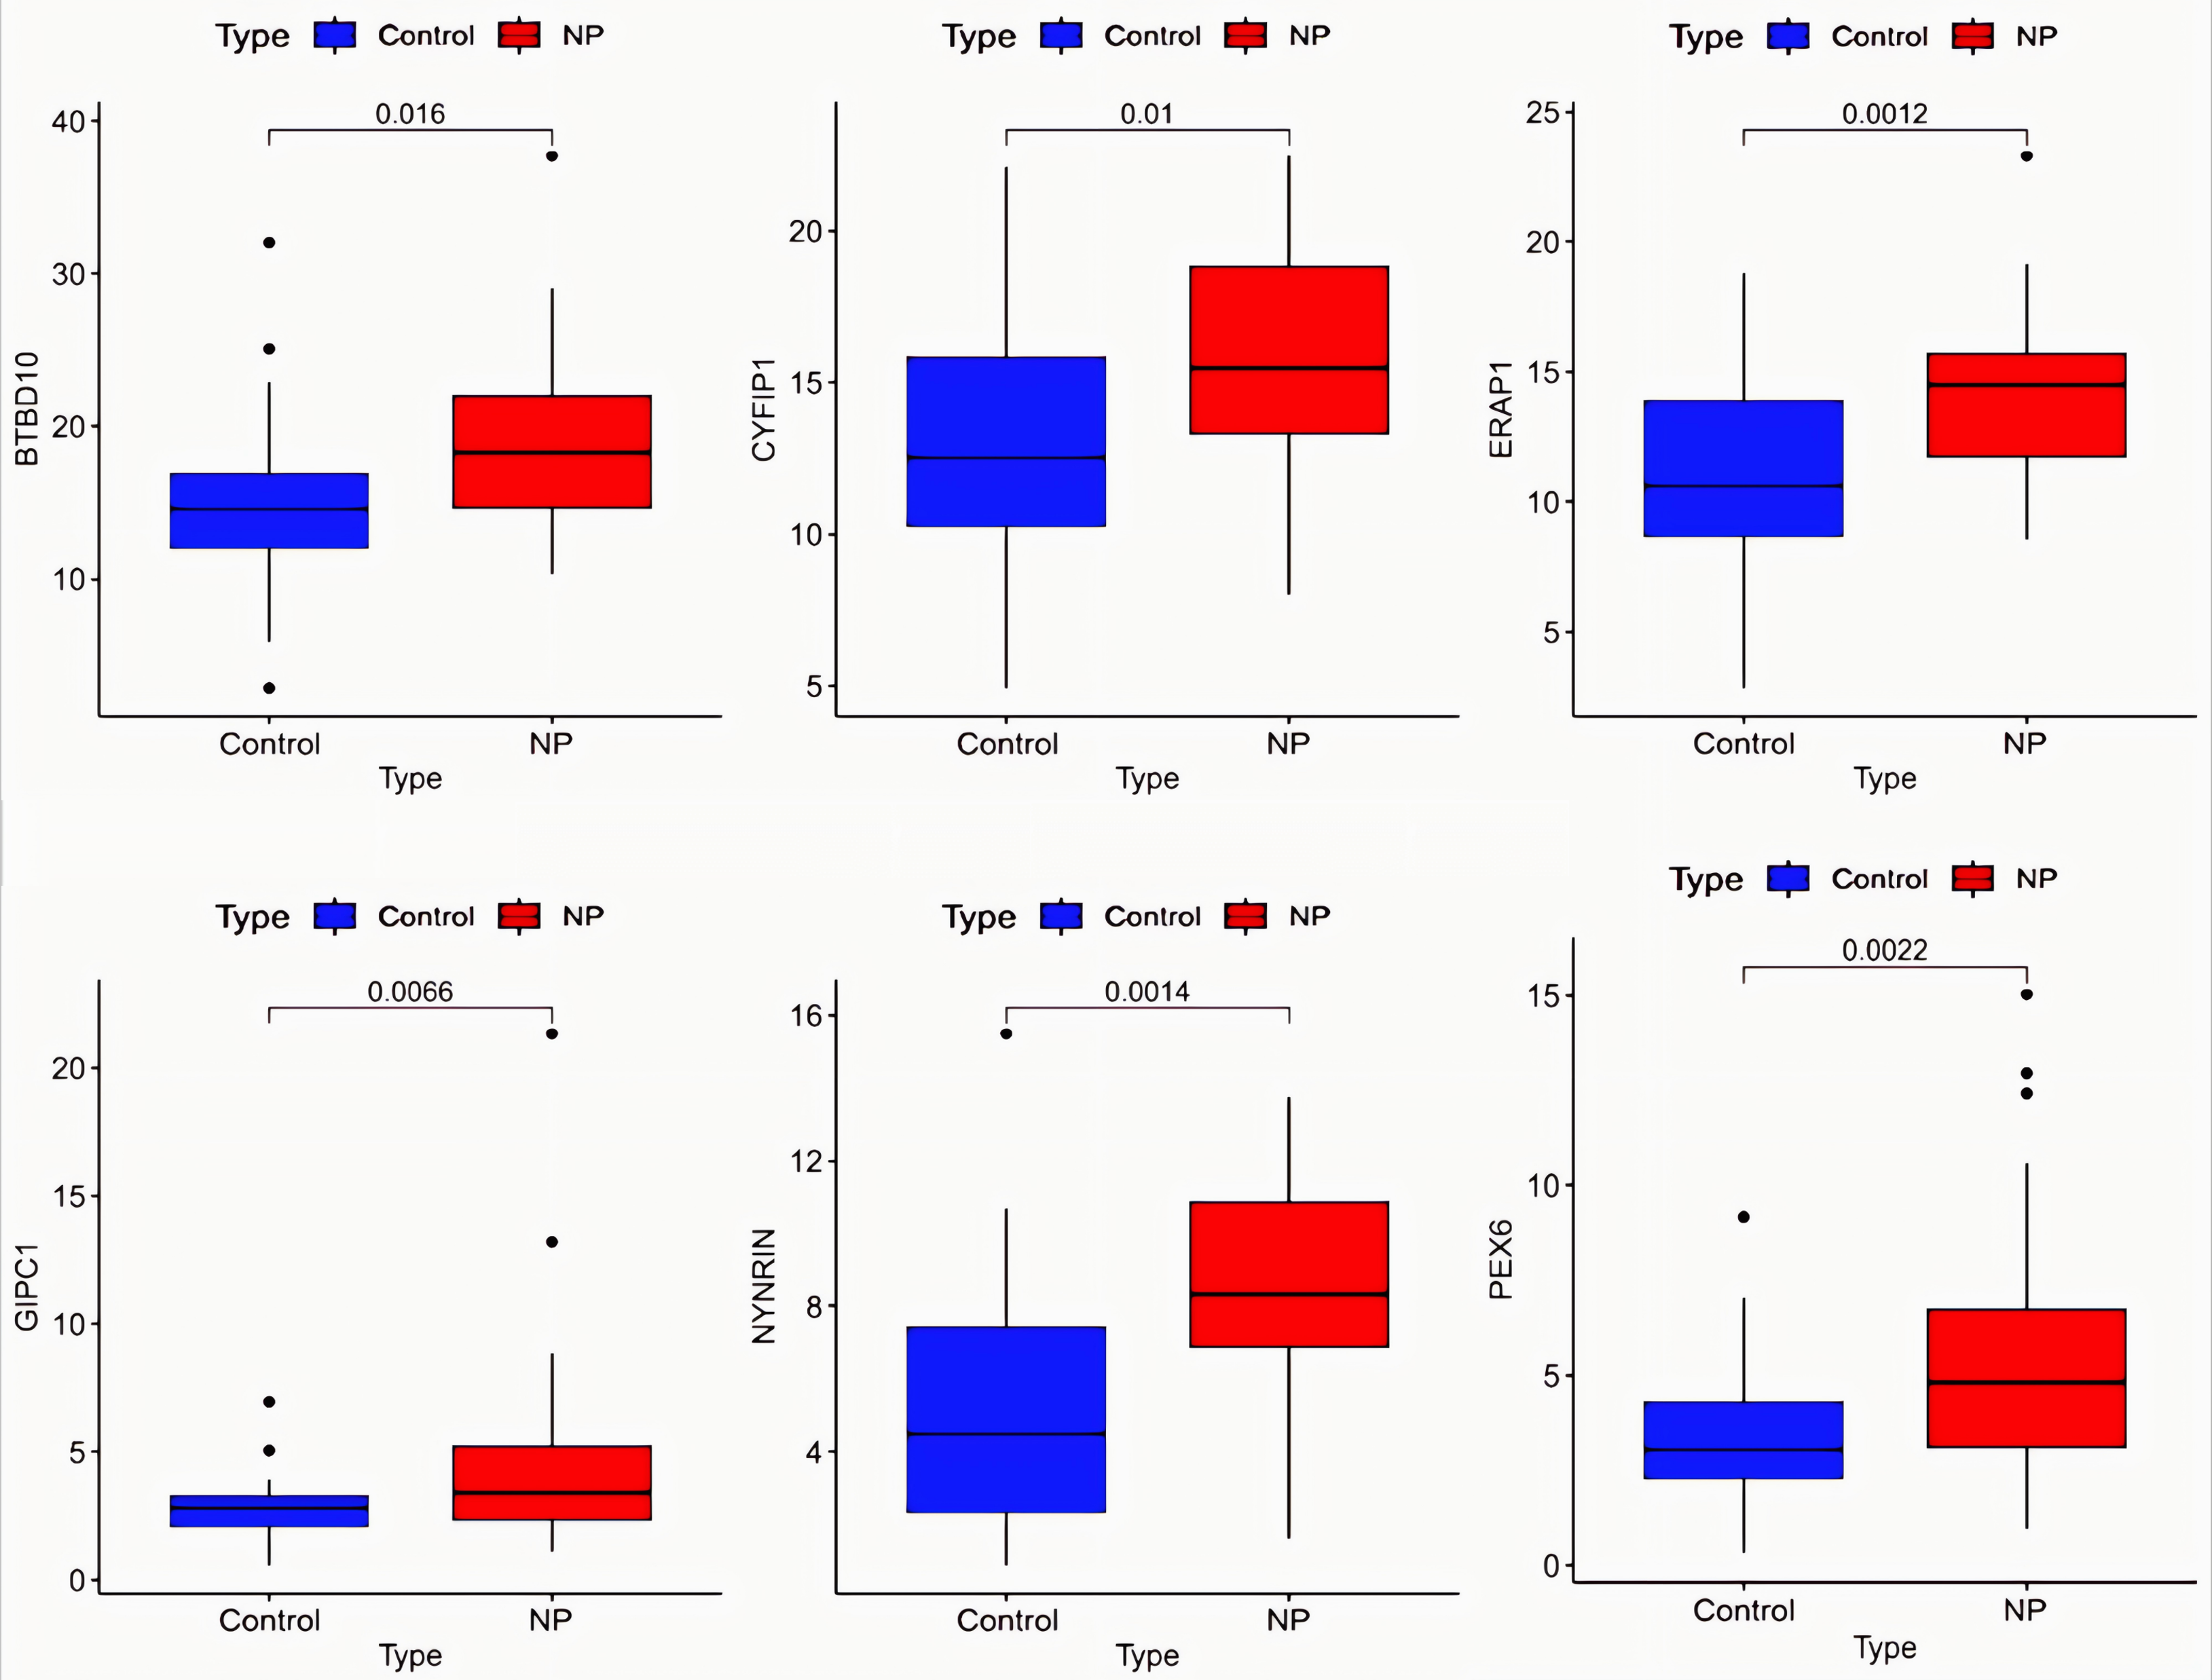


Supplementary Figure 2 A bar chart illustrating the differential expression of hub genes in GSE136825. NP : nasal polyposis
